# Supplementary material for: Functionalised biphenylene and graphenylene: excellent choices for supercapacitor electrodes
Source: Royal Society of Chemistry journal article supplement (doi:10.1039/d4cp03624g), 2024-01-01
Supplement: d4cp03624g1.pdf [file d4cp03624g1.pdf]

## Supplementary Information File

# Functionalised Biphenylene and Graphenylene: Excellent Choices for Supercapacitor Electrode

Krishnanshu Basak<sup>a</sup>, Mainak Ghosh<sup>a</sup>, N Bedamani Singh<sup>b</sup>, Rajkumar Mondal<sup>c</sup>, Debnarayan Jana<sup>a,\*</sup>

<sup>a</sup>Department of Physics, University of Calcutta, 92 A. P. C. Road, Kolkata-700009, India

<sup>b</sup>Department of Physics, Nagaland University, Nagaland 798627, India

<sup>c</sup>Department of Physics, Nabadwip Vidyasagar College, Nabadwip-741302, India

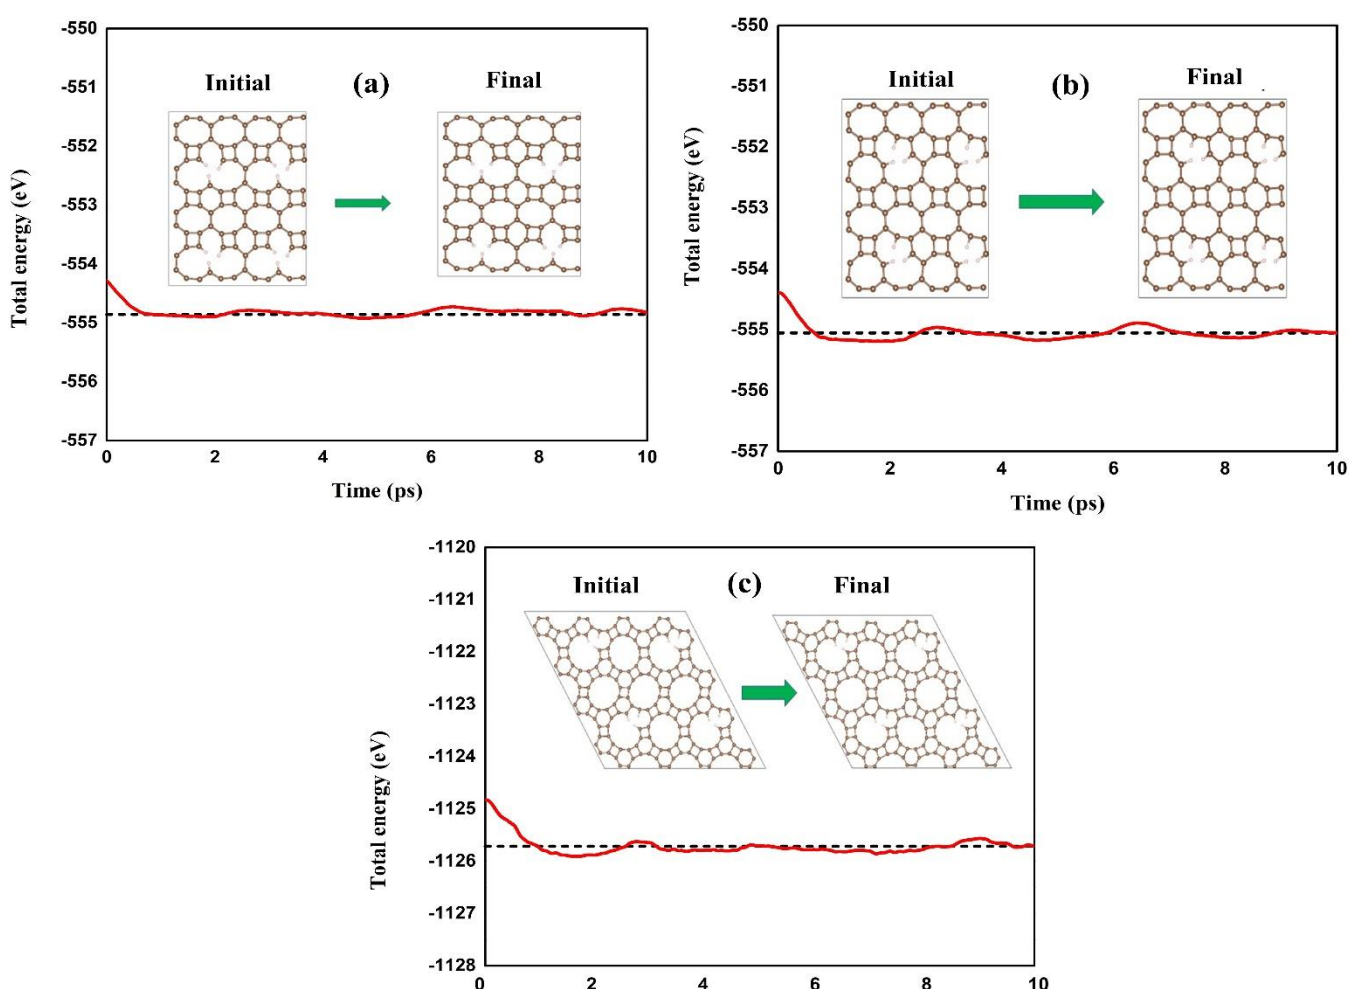

**Fig.S1:** Total energy vs time plot of (a) BPN (Vacancy 1), (b) BPN (Vacancy 2), (c) GPN (Vacancy 1) obtained from AIMD simulation at 300 K.

(a)

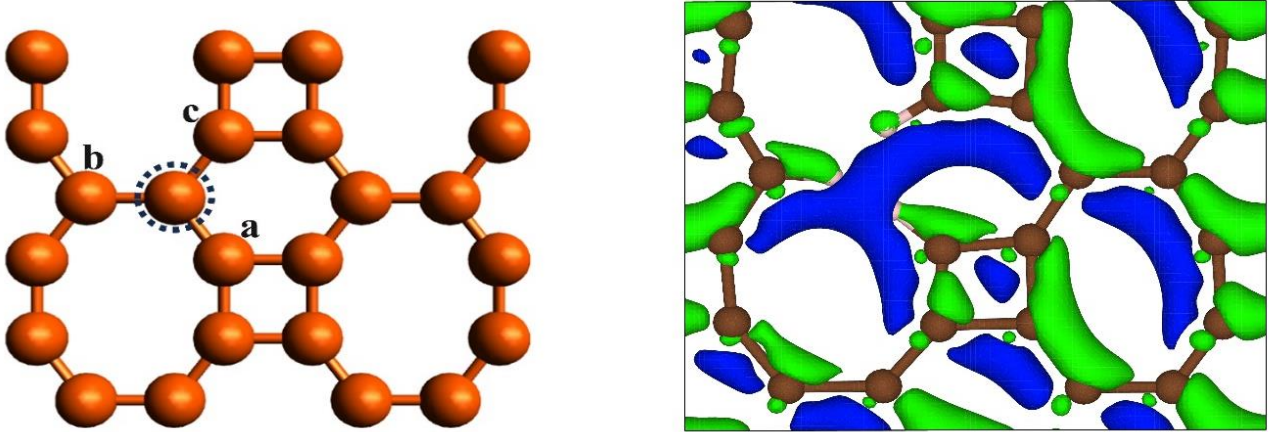

(b)

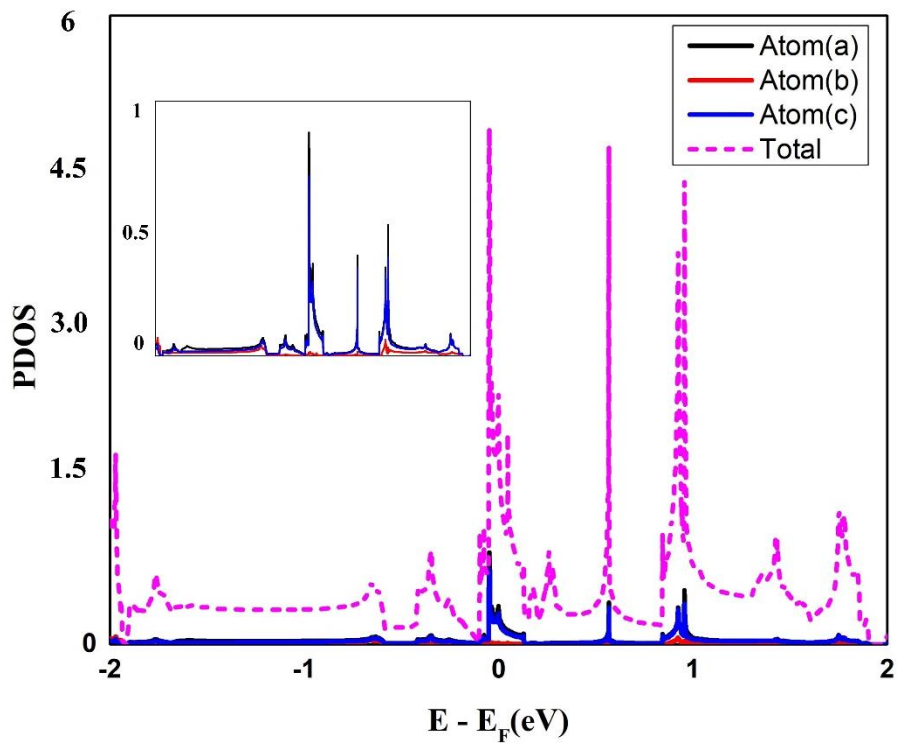

**Fig.S2:** (a) Vacancy modified BPN monolayer (vacancy 1) and corresponding charge density difference plot. The green and blue color denote accumulation and depletion of charges. The isosurface value is set to  $0.05 \text{ e}/\text{\AA}^3$  (b) PDOS analysis of vacancy modified defective BPN monolayers. The contribution of p orbital of individual atoms is shown in the inset.

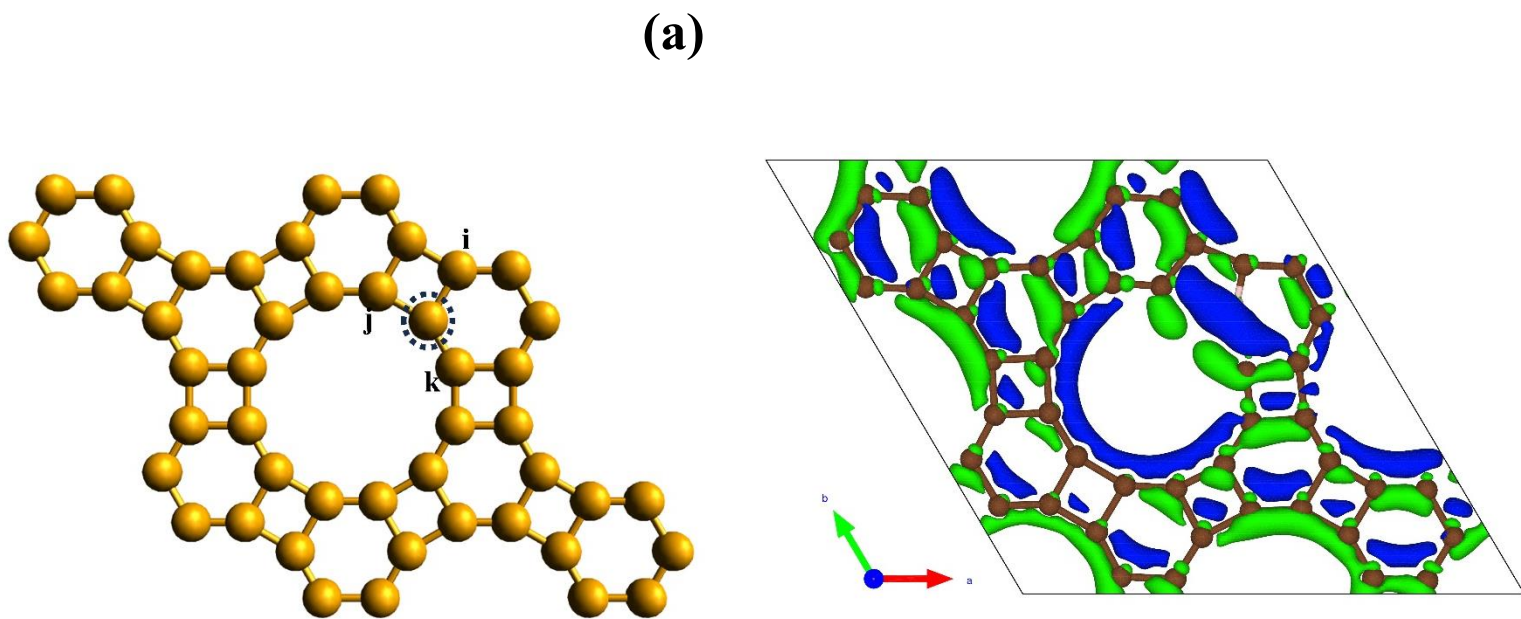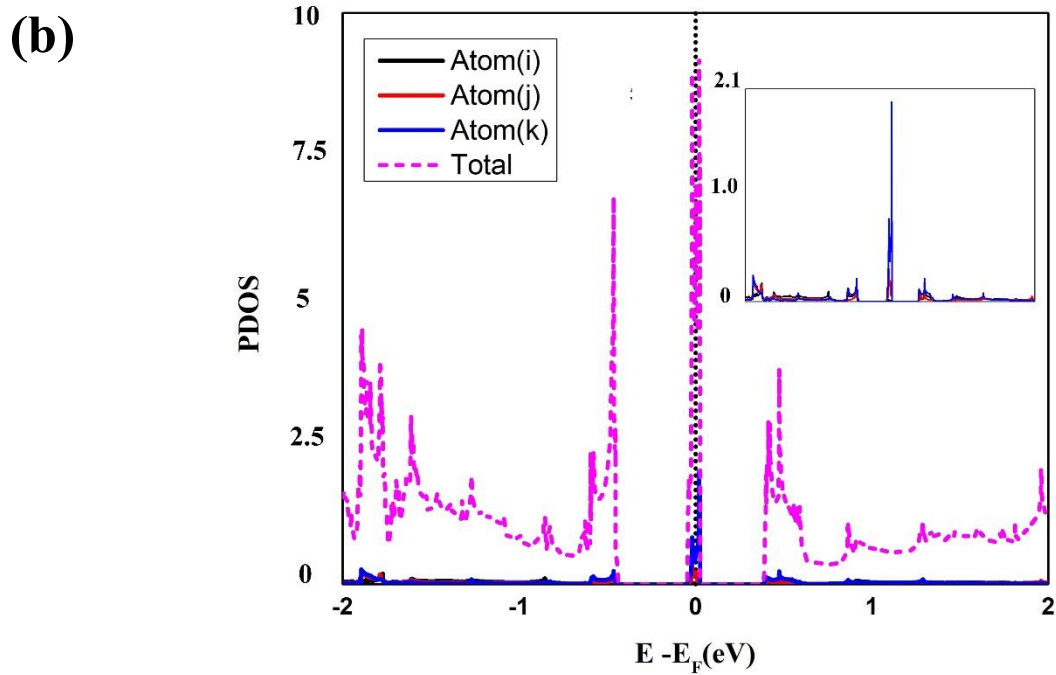

**Fig.S3:** (a) Vacancy modified GPN monolayer and corresponding charge density difference plot. The green and blue color denote accumulation and depletion of charges. The isosurface value is set to  $0.07 \text{ e}/\text{\AA}^3$  (b) PDOS analysis of vacancy modified defective GPN monolayers. The contribution of p orbital of individual atoms is shown in the inset.
